# Supplementary material for: A rapid transcriptional activation is induced by the dormancy-breaking chemical hydrogen cyanamide in kiwifruit (Actinidia deliciosa) buds
Source: PubMed Central journal article supplement — J Exp Bot. 2009 Aug 3;60(13):3835–48. doi: 10.1093/jxb/erp231 (PMC2736901; doi:10.1093/jxb/erp231), 2009-08-03

A rapid transcriptional activation is induced by the dormancy-breaking chemical hydrogen cyanamide in kiwifruit (*Actinidia deliciosa*) buds

*Eric F Walton, Rong-Mei Wu, Annette C Richardson, Marcus Davy, Roger P Hellens, Kate Thodey, Bart J Janssen, Andrew P Gleave, Georgina M Rae, Marion Wood, and Robert J Schaffer*

Supplementary Material

Supplementary Table S1 & Figures S1-S4

**Table S1:** List of PCR primers used, product size and unique identifier for each gene.

| GenBank No. | Top blast hit                          | Forward primer sequence | Reverse primer sequence | Product size | Unique ID <sup>1</sup> |
|-------------|----------------------------------------|-------------------------|-------------------------|--------------|------------------------|
| FG471021    | ABC transporter                        | TGGTTGGGTCCTCATCTTCT    | CAGAGGGGCTATGGTTTCTT    | 163          | 238017                 |
| FG473412    | ABC transporter                        | TGCAGATGTTTTCCAAGCAG    | TGATCACTGCATCGGATGTT    | 155          | 199232                 |
| FG440519    | Actin                                  | CCAAGGCCAACAGAGAGAAG    | GACGGAGGATAGCATGAGGA    | 197          | 197478                 |
| FG466527    | AdADH1                                 | CATCCCTCCGTAGTCGAAA     | TTCCTTCATGCTGATGATGC    | 148          | 194711                 |
| FG525579    | AdADH2                                 | TCGAGTACATGCTGAAAGGAGA  | CACCAGCAAACACTGAAAAG    | 153          | 297810                 |
| FG458399    | AdCatalase1                            | GGTGGTGTAAACCCTGGATG    | AAAAGTCACGCCATGCAACT    | 143          | 319700                 |
| FG511122    | AdCDKB1                                | TTCGGCAAAGAAAGCTATGG    | TATCCTAATGGGACGCCAAA    | 134          | 299318                 |
| FG471388    | 5'-adenylylsulfate reductase           | GGTGGCTTTTGTGAATGCTC    | TGCACCTCTGTCCTTCTCTGT   | 143          | 195011                 |
| FG521122    | AdGDBRPK1                              | GCAGCGGAGAAATCGTCTAC    | AACAGAGTGGAAGGAAGCA     | 154          | 310648                 |
| FG475975    | AdPDC                                  | TGGACGACTAAGGTGCACTG    | TAGCAGCAGCGAGAAGGATT    | 204          | 230204                 |
| FG473154    | Brassinosteroid signalling             | GAATGCTCGGGAGAAAAGGT    | GGGCTCACCTCAATCACTGT    | 105          | 198972                 |
| FG474406    | CBS domain-containing protein          | TGAAGAAGAGGAAGCTGTTGG   | AAACCAGCGTCGTCATGAAT    | 118          | 200316                 |
| FG471167    | Cinnamyl-alcohol dehydrogenase         | TAGTACCTCCCCTGGCAAGA    | GGAGAGGGTGTGTGCTGAT     | 146          | 195091                 |
| FG478690    | Curculin-like (mannose binding) lectin | TCAAGGTGTTGGATTGCGTA    | GAAACCCTTCACCAGCATTC    | 190          | 241940                 |
| FG497462    | DNAJ heat shock protein                | CGCAACTTCATCGAGATTCA    | ATTGTTTGTGCCGGTGATTT    | 203          | 304399                 |
| FG486662    | Embryo-abundant protein                | AATACAAATGCACCCCTCCA    | AGGAGCCATTTGACTTGGTG    | 145          | 249883                 |
| FG479502    | ERF/AP2 transcription factor           | TCGTCCTCTGTGGTTGATTG    | TCCGTCGACATGTCAAGATT    | 108          | 242757                 |
| FG459066    | Expressed protein                      | TCCTGCTGCTACTGGTCTTG    | GACTCTGATTGGGTGGTCGT    | 169          | 192836                 |
| FG475773    | Expressed protein                      | GAAGAAGAAAGGCGGGTTTT    | CGAACCCTTGTAGACATCACC   | 126          | 206599                 |

|          |                                   |                           |                           |     |        |
|----------|-----------------------------------|---------------------------|---------------------------|-----|--------|
| FG512494 | Expressed protein                 | TTGCACCATGGAGGTCAATA      | GGGGACAATAGCATCAAACC      | 149 | 316318 |
| FG470652 | FAD-binding protein               | ACTTTGCCTTCATGGTGGAC      | GCACCGATTCAATATCTCTGG     | 122 | 240862 |
| FG402777 | F-box protein                     | TTGGAGGAACAAGGGTTTTG      | TGCAACTTGTGACAGACATCA     | 125 | 158295 |
| FG471302 | Galactinol synthase               | TTGTGCTGCTGGATCGAAG       | TGAACAACACTTTAGCCTATGCTCT | 242 | 194925 |
| FG423204 | Glutathione <i>S</i> -transferase | CTCAAGTTTCAAGCCCTTCG      | TGAGATGGGAAGTTGTCCTTG     | 129 | 168251 |
| FG523871 | Glutathione <i>S</i> -transferase | TGCTGAAGCAGAAGTTTGGA      | AGTGTCCACAGGGAACAACAC     | 100 | 313564 |
| FG526647 | Glycoside hydrolase               | CGGGATGTGTGATTTTCCTC      | GCATGGATGGCTTTGATACA      | 163 | 314813 |
| FG526418 | Glycosyltransferase               | GAAGGATTTGGCCAAGGAAG      | CACGAAAGACAAATCAAACCA     | 145 | 299752 |
| FG460267 | In2-1 protein                     | GTCAATTCAGTCTGGTAGACATTGC | CTGGGGCATTCAATTTCACTAC    | 230 | 243648 |
| FG474947 | LEA protein                       | GGTGGTGCCGGTTACAATTA      | ACTCGGGGGTACCGAAAATA      | 186 | 202743 |
| FG498083 | Magnesium/proton exchanger        | GTCGTGTTGTCTCCCTTAAA      | CCCGCAGGGAATACAATACA      | 127 | 305021 |
| FG470796 | Myb transcription factor          | ACAACCGACAATTTGTGGAA      | CCACAATAATTAACTTTTCCTTCA  | 144 | 238243 |
| FG510928 | NF-X1-like zinc finger protein    | CGGACTGGATGAACGAAGTC      | TCCAGGTCCAGACAGAAAAA      | 201 | 299124 |
| FG456774 | Not determined by homology        | GCCAATAATTTCTCCCACA       | GAATTCCTAATTGAAGAGGCTCA   | 202 | 189927 |
| FG508405 | Ovule development protein         | TGGTTGTACTGCGTCGGTTA      | CACTTGGCCATTGTTATGGT      | 127 | 278316 |
| FG477785 | Protein kinase                    | TACACGACATAGCGGACGAA      | CGATAAGGGAGTCGGTTCTT      | 162 | 232101 |
| FG446808 | SAM:carboxyl methyltransferase    | CGGGCTTGAAGGAATTTTAA      | GGATGAGACCAGACCACTTGA     | 179 | 107699 |
| FG479735 | Secretory protein                 | AAGTGGGTTTGTGGCAGAAC      | ACACAGTTGTGCCATCGTCT      | 201 | 193221 |
| FG491038 | Wound-responsive protein          | CCTCTTCGGTGATGGCTAAA      | CTACAGCCCATATTGCAAGC      | 164 | 272022 |
| FG511957 | Zinc finger protein               | GCTAACAGTTTTCCCCAGCA      | CAAATTCAGCTCCGGTAGGA      | 134 | 314160 |

<sup>1</sup>The unique identifier is the number of the EST that is used for microarray oligonucleotide design.

**Fig. S1.** Expression profiles of genes selected that showed Profile 1 pattern of expression when analysed by qPCR over the extended time course (Day -1 to Day 42).

**Fig. S2.** Expression profiles of genes selected that showed Profile 2 pattern of expression when analysed by qPCR over the extended time course (Day -1 to Day 42).

**Fig. S3.** Expression profiles of genes selected that showed Profile 3 pattern of expression when analysed by qPCR over the extended time course (Day -1 to Day 42).

**Fig. S4.** Expression profiles of genes selected that did not fit into Profiles 1, 2 or 3 when analysed by qPCR over the extended time course (Day -1 to Day 42).

Fig. S1

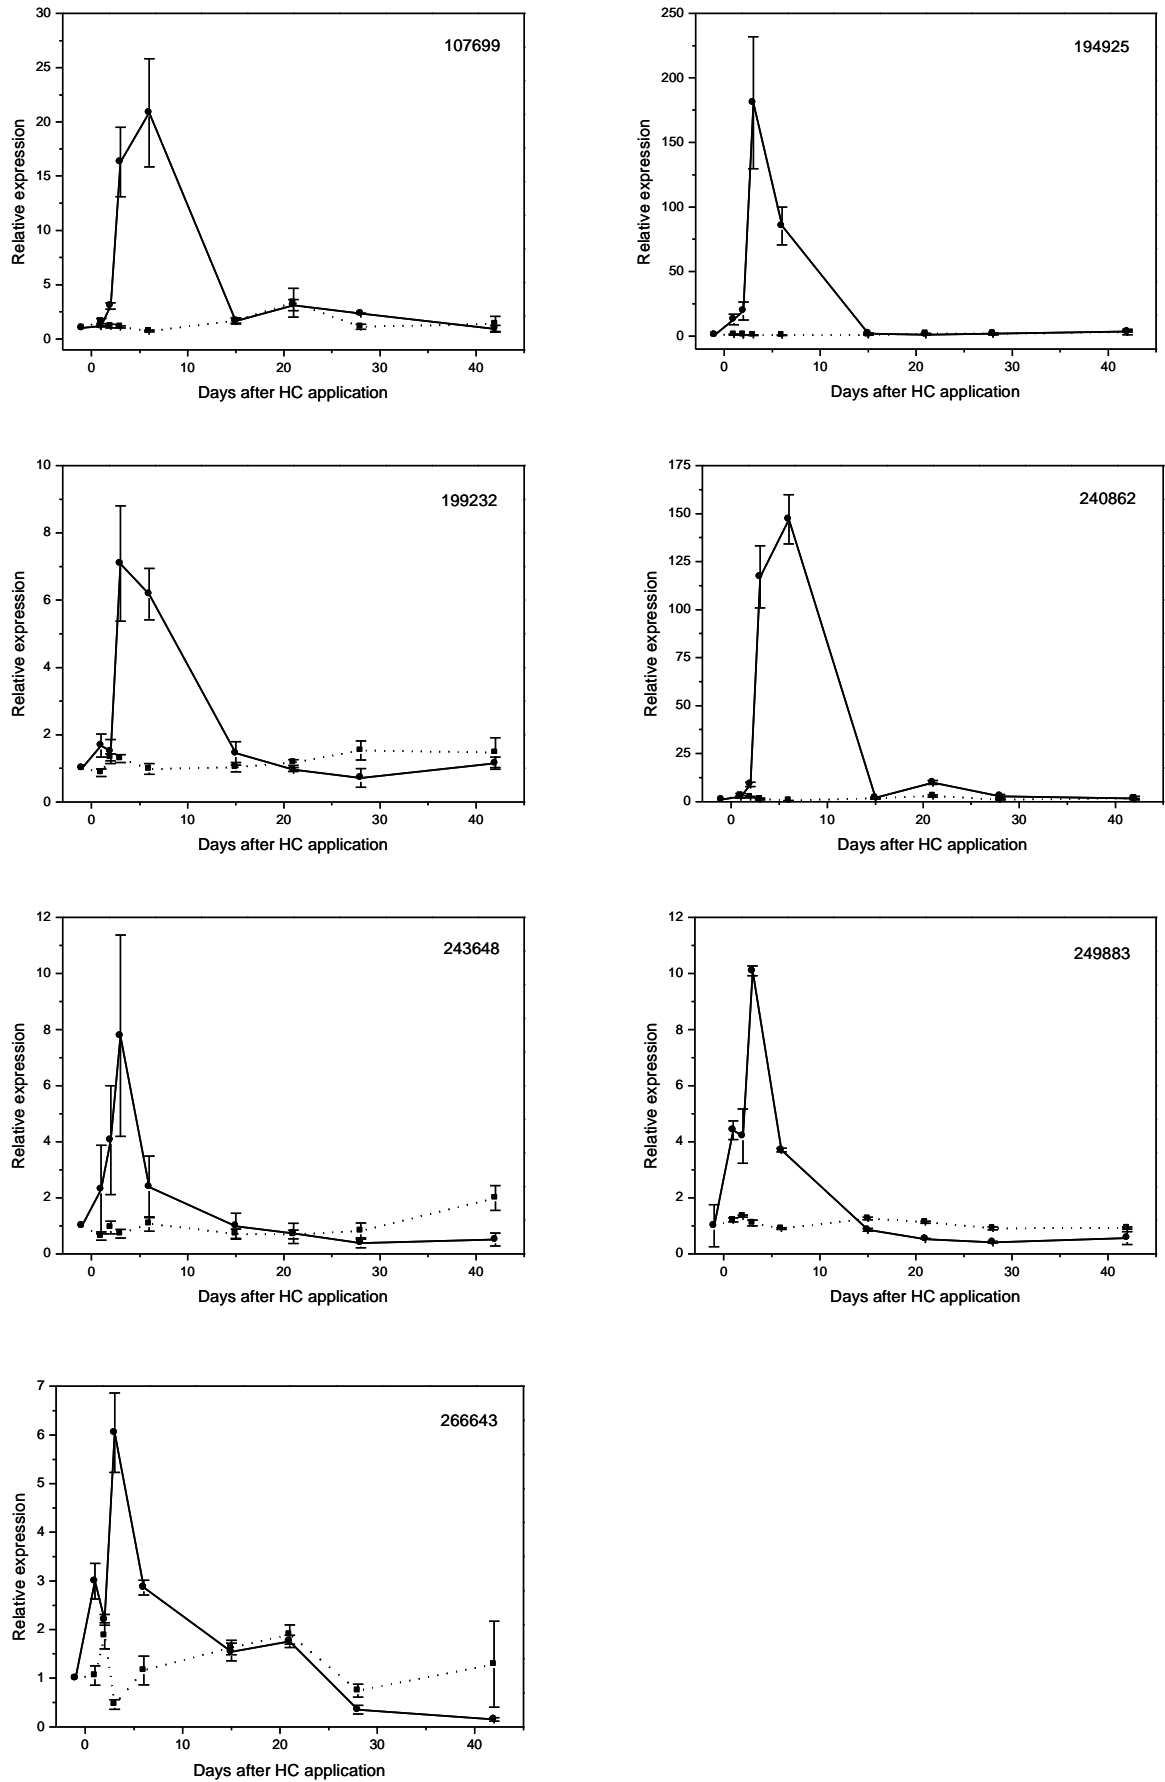

Fig. S2

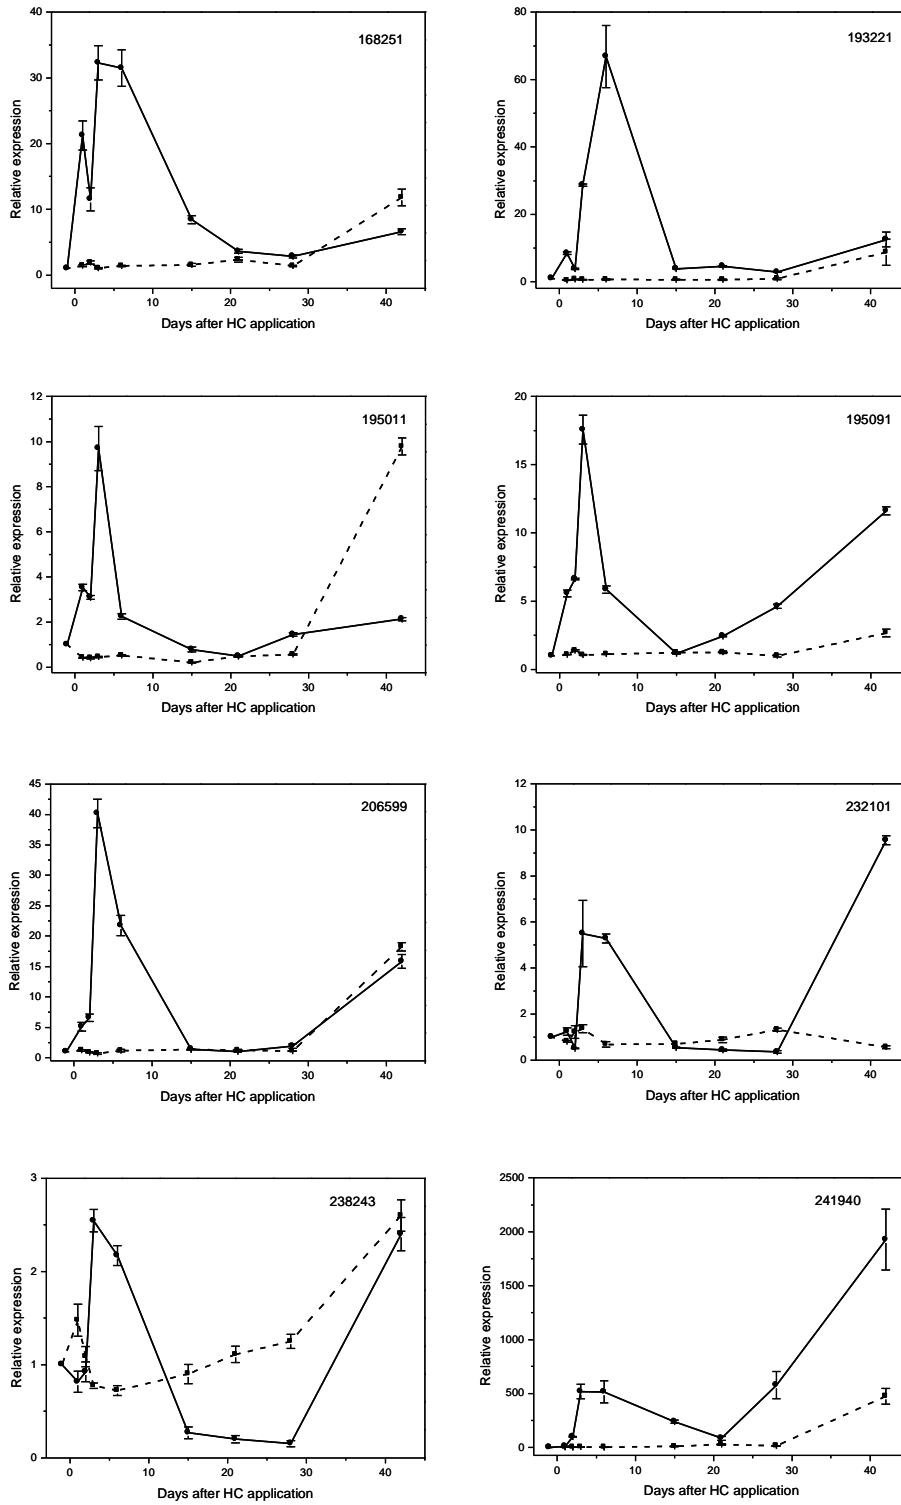

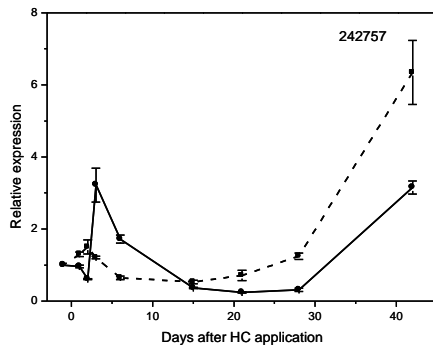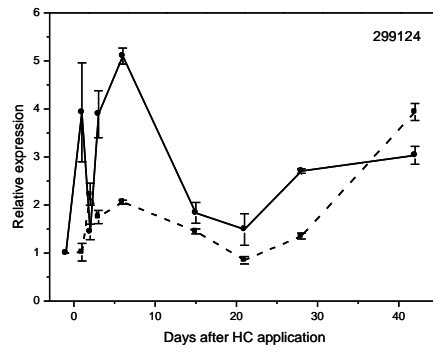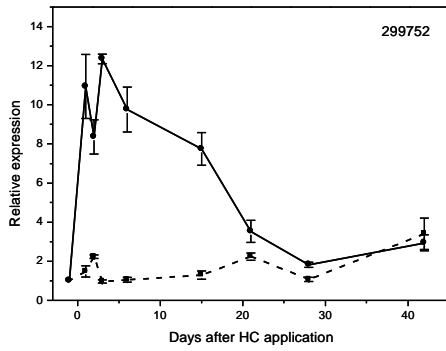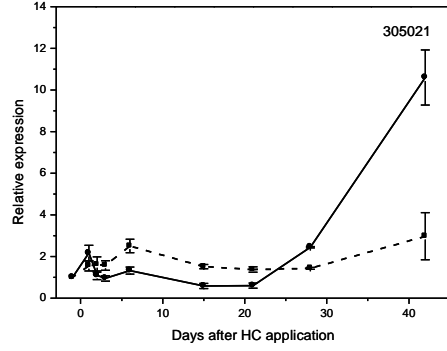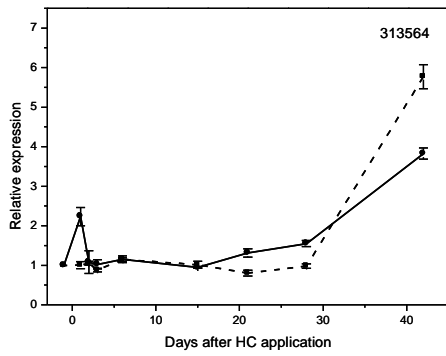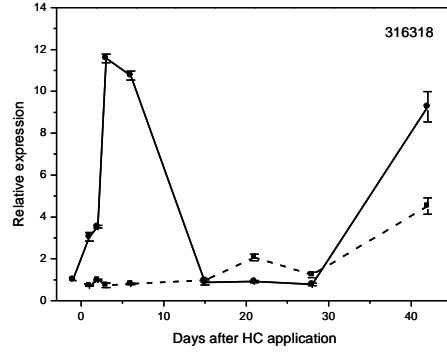

Fig. S3

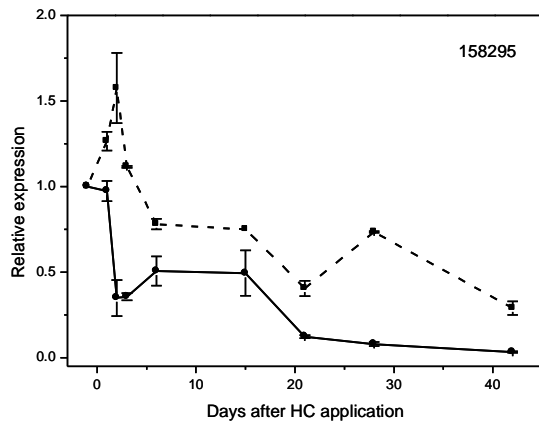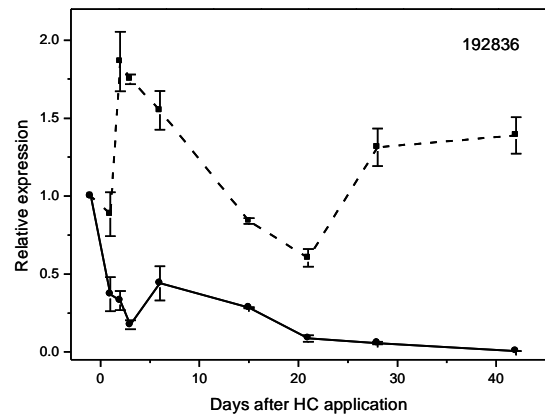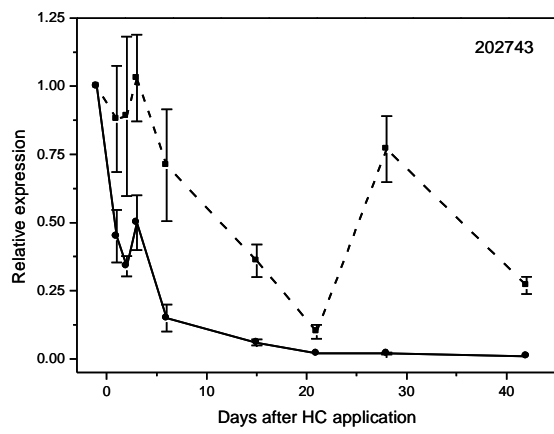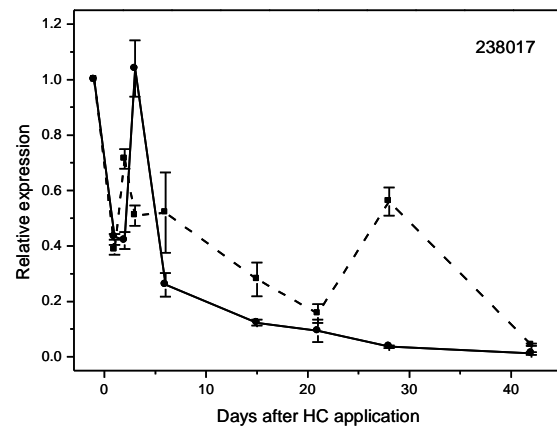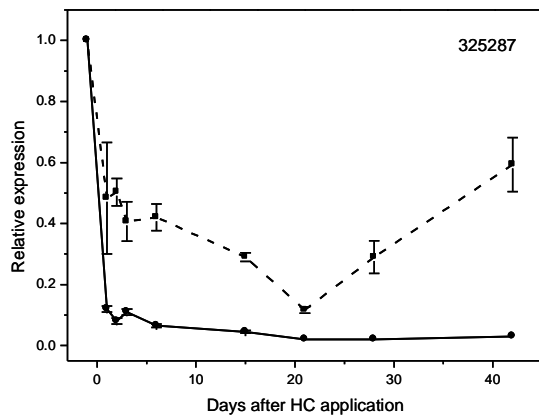



Fig. S4

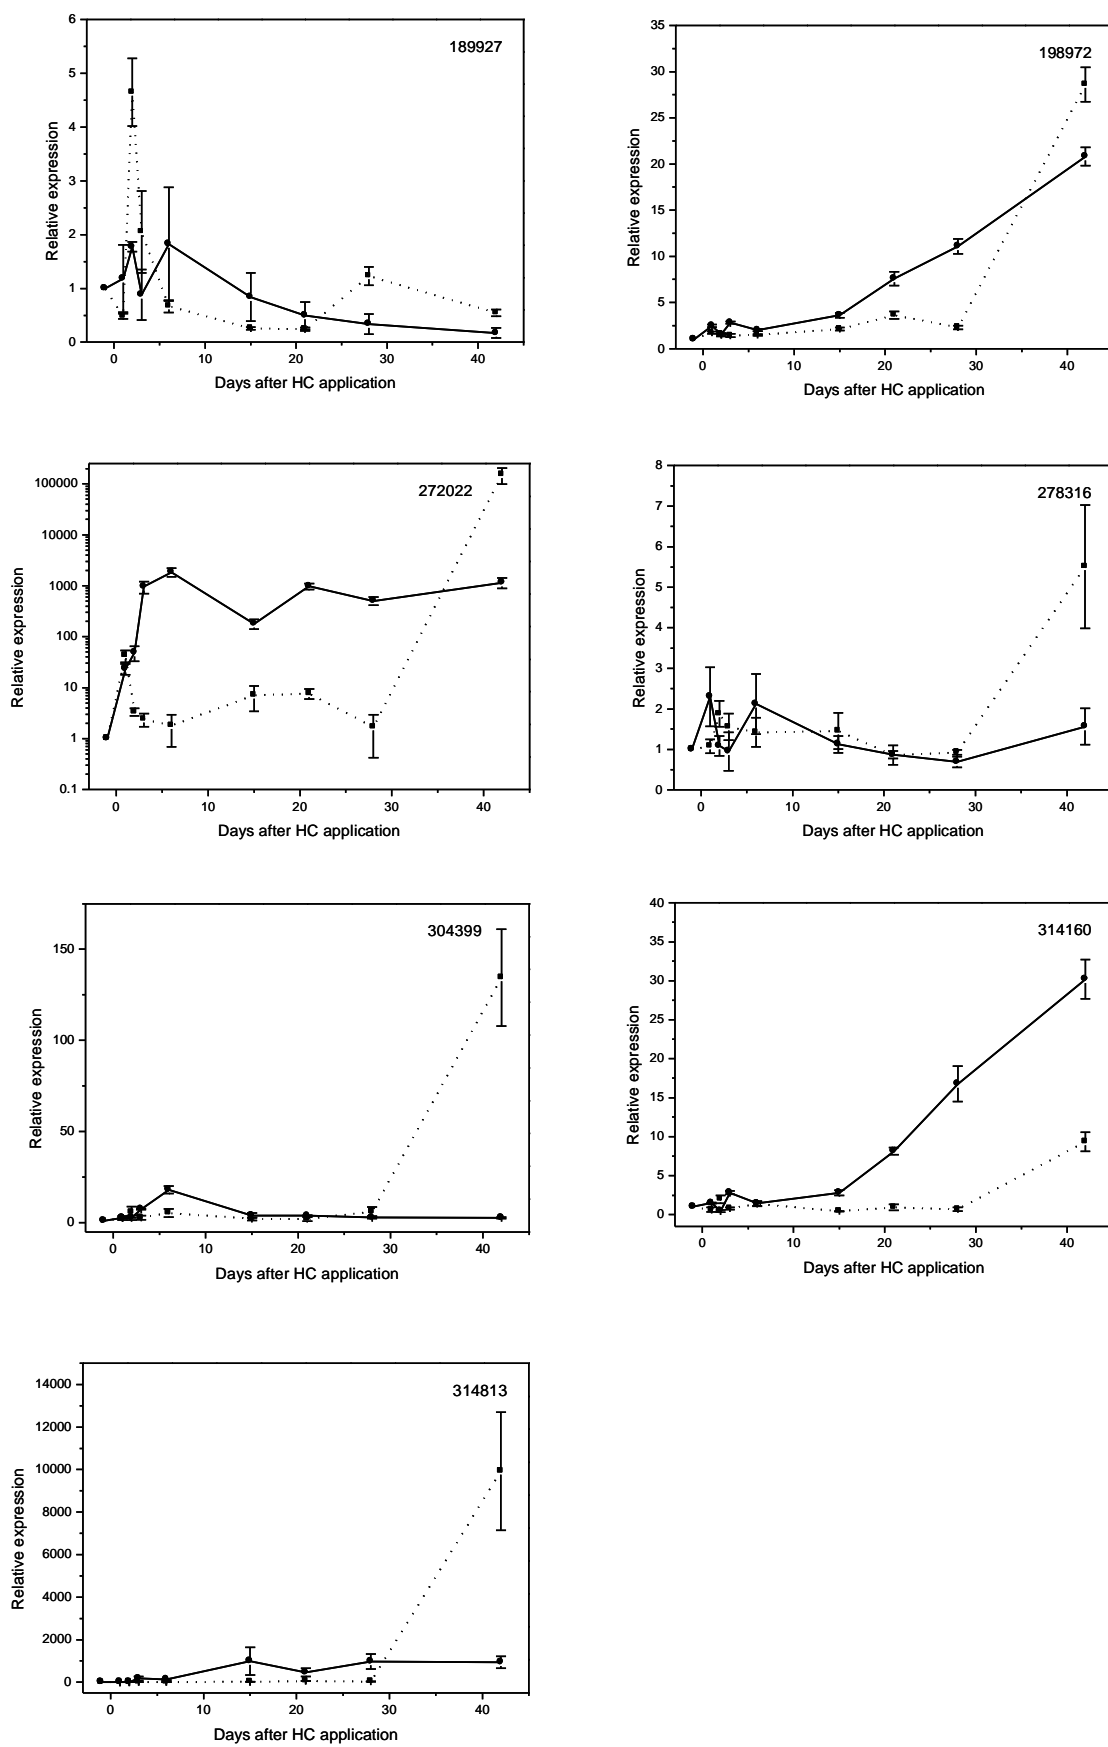

Supplement: erp231_1.pdf [file erp231_1.pdf]
